# Supplementary material for: The enhancement for SCR of NO by NH3 over the H2 or CO pretreated Ag/γ-Al2O3 catalyst
Source: Royal Society of Chemistry journal article supplement (doi:10.1039/c4cp00809j), 2014-01-01
Supplement: c4cp00809j1.pdf [file c4cp00809j1.pdf]

## Supplementary

Fig. S1.  $\text{NH}_3$ -TPD profiles of Ag/Al and Ag/Al-H samples.

Fig. S2. Catalytic performance of  $\text{Al}_2\text{O}_3$  and  $\text{Al}_2\text{O}_3$ -H samples.

Fig. S3. O1s spectrum of Ag/Al and Ag/Al-H samples.

Fig. S4 The  $\text{NO}_x$  conversion of first test and second test for (a) Ag/Al sample and (b) Ag/Al-H sample.

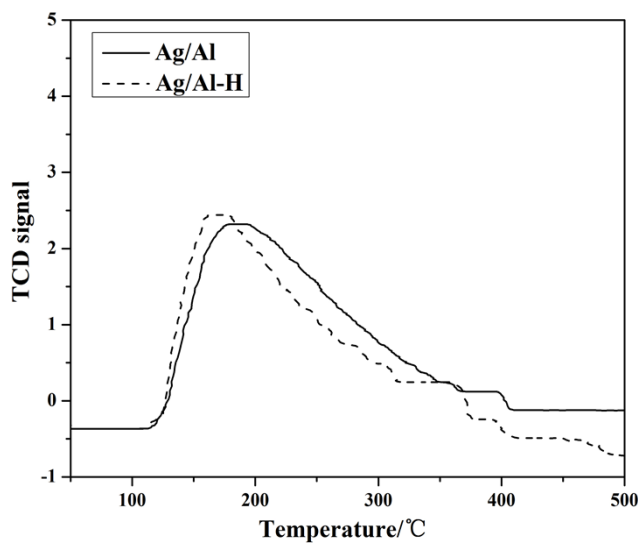

Figure S1

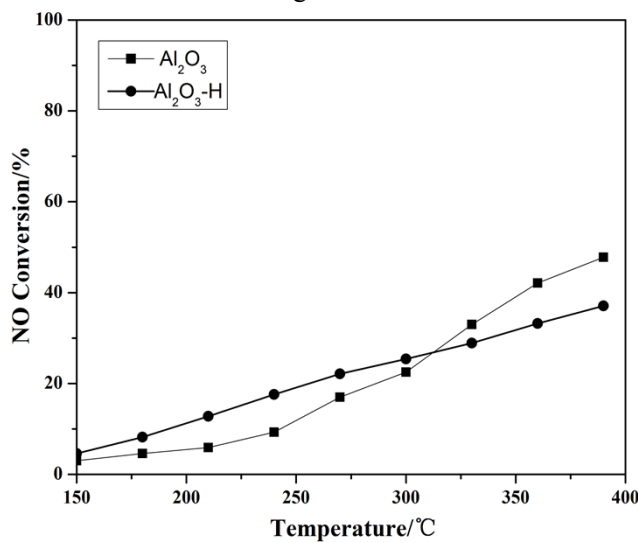

Figure S2

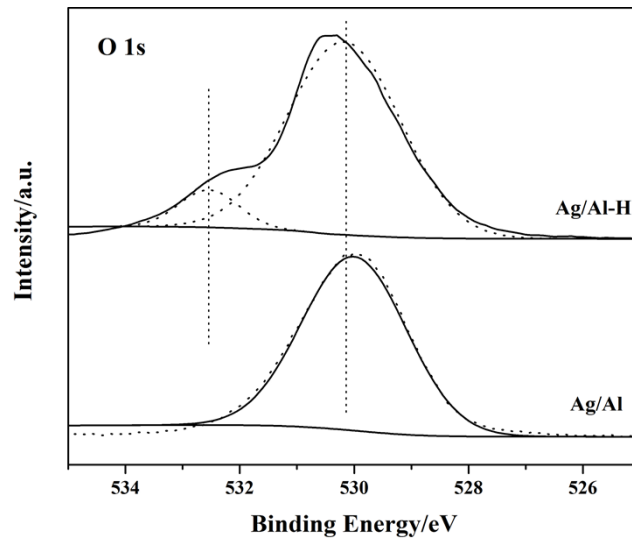

Figure S3

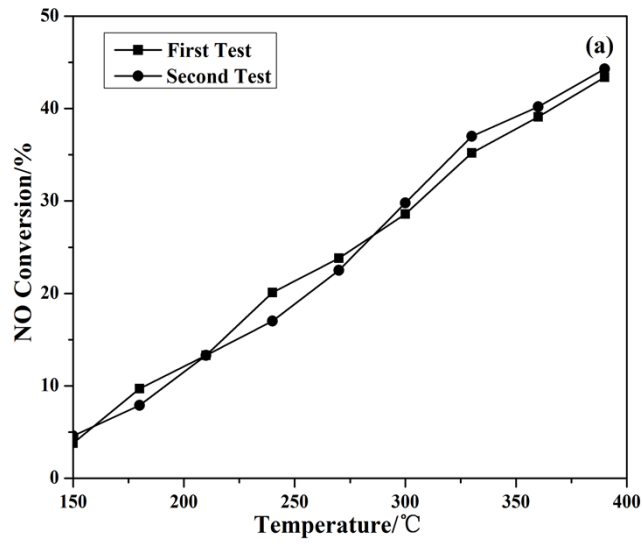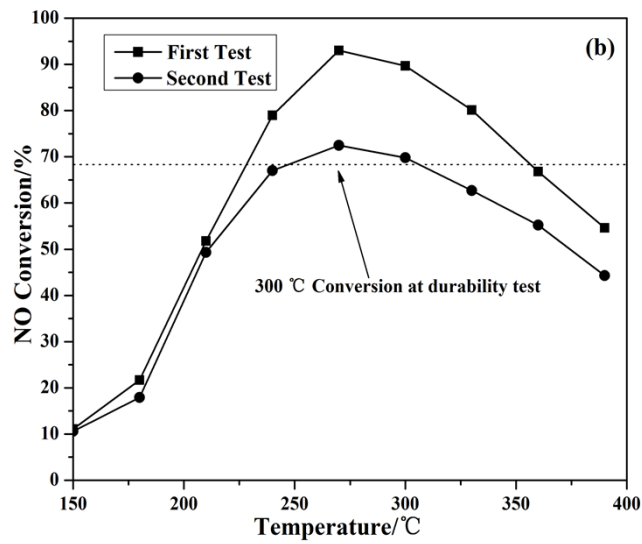

Figure S4
